# Supplementary material for: Evaluation of serological lateral flow assays for severe acute respiratory syndrome coronavirus-2
Source: Springer Nature journal article supplement (doi:10.1186/s12879-021-06257-7), 2021-06-16
Supplement: MOESM1 [file 19265844]

**Title:** Evaluation of serological lateral flow assays for severe acute respiratory syndrome coronavirus-2

**Author list:**

Bianca A. Trombetta<sup>1\*</sup>, Savannah E. Kandigian<sup>1\*</sup>, Robert R. Kitchen<sup>2,3\*</sup>, Korneel Grauwet<sup>4\*</sup>, Pia Kivisäkk Webb<sup>1,2</sup>, Glenn A. Miller<sup>3</sup>, Charles G. Jennings<sup>4,5</sup>, Sejal Jain<sup>6,7</sup>, Samara Miller<sup>2,8,9,10</sup>, Yikai Kuo<sup>1,4</sup>, Thadryan Sweeney<sup>4</sup>, Tal Gilboa<sup>11,12</sup>, Maia Norman<sup>11,12,13</sup>, Daimon P. Simmons<sup>14</sup>, Christopher E. Ramirez<sup>1</sup>, Melissa Bedard<sup>14</sup>, Catherine Fink<sup>15</sup>, Jina Ko<sup>10,16</sup>, Esmarline J. De León Peralta<sup>17,18,19</sup>, Gerald Watts<sup>14</sup>, Emma Gomez-Rivas<sup>14</sup>, Vannessa Davis<sup>12</sup>, Rocky Barilla<sup>20</sup>, Jianing Wang<sup>21</sup>, Pierre Cunin<sup>14</sup>, Samuel Bates<sup>22</sup>, Chevaun Morrison-Smith<sup>12</sup>, Benjamin Nicholson<sup>23</sup>, Edmond Wong<sup>23</sup>, Leena El-Mufti<sup>1</sup>, Michael Kann<sup>23</sup>, Anna Bolling<sup>1</sup>, Brooke Fortin<sup>1</sup>, Hayden Ventresca<sup>21</sup>, Wen Zhou<sup>24</sup>, Santiago Pardo<sup>1</sup>, Megan Kwock<sup>25</sup>, Aditi Hazra<sup>2,26</sup>, Leo Cheng<sup>27</sup>, Q. Rushdy Ahmad<sup>11</sup>, James A. Toombs<sup>28</sup>, Rebecca Larson<sup>29,30</sup>, Haley Pleskow<sup>23,31</sup>, Nell Meosky Luo<sup>31</sup>, Christina Samaha<sup>31</sup>, Unnati M. Pandya<sup>2,33</sup>, Pushpamali De Silva<sup>18</sup>, Sally Zhou<sup>34,35</sup>, Zakary Ganhadeiro<sup>34,35</sup>, Sara Yohannes<sup>28</sup>, Rakeisha Gay<sup>28, 35</sup>, Jacqueline Slavik<sup>28</sup>, Shibani Mukerji<sup>1</sup>, Petr Jarolim<sup>7,12</sup>, David R. Walt<sup>11,12</sup>, Becky C. Carlyle<sup>1,2</sup>, Lauren L. Ritterhouse<sup>17\*\*</sup>, Sara Suliman<sup>14\*\*\*#</sup>

\* and \*\* contributed equally

**#Corresponding Author:**

Sara Suliman, MPH, PhD, Division of Rheumatology, Inflammation and Immunity, Brigham and Women's Hospital, Boston MA. Diagnostics Accelerator Working Group and Laboratory of the Mass General and Brigham Center for COVID Innovation (MGBCCI), 149 Navy Yard room: 4325, Charlestown MA, USA. Email: [ssuliman1@bwh.harvard.edu](mailto:ssuliman1@bwh.harvard.edu)

**Affiliations:**

1. Department of Neurology, Massachusetts General Hospital, Harvard Medical School, Charlestown, Boston, MA
2. Department of Medicine, Harvard Medical School, Boston, MA
3. Mass General Brigham Innovation, Boston, MA
4. Cardiology Division, Massachusetts General Hospital, Charlestown, MA
5. Department of Neurosurgery, Brigham and Women's Hospital, Harvard Medical School, Boston, MA
6. Department of Medical Oncology and Center for Cancer-Genome Discovery, Dana-Farber Cancer Institute, Boston, MA
7. Department of Pathology, Harvard Medical School, Boston, MA

8. Center for Regenerative Medicine, Massachusetts General Hospital, Boston, MA
9. Harvard Stem Cell Institute, Cambridge, MA
10. Department of Psychiatry, Massachusetts General Hospital, Boston, MA
11. Wyss Institute for Biologically Inspired Engineering, Harvard University, Boston, MA
12. Department of Pathology, Brigham and Women's Hospital, Harvard Medical School, Boston, MA
13. Sackler School of Biomedical Sciences, Tufts University School of Medicine, Boston, MA
14. Division of Rheumatology, Inflammation and Immunity, Brigham and Women's Hospital, Boston, MA
15. Medical Diagnostic Technology Evaluation, LLC, Carlisle, MA
16. Center for Systems Biology, Massachusetts General Hospital, Boston, MA
17. Department of Pathology, Massachusetts General Hospital, Boston, MA
18. Wellman Center for Photomedicine, Massachusetts General Research Institute, Boston, MA
19. Department of Dermatology, Massachusetts General Hospital, Boston, MA
20. Evergrande Center for Immunologic Diseases, Brigham and Women's Hospital, Boston, MA
21. Cardiovascular Division, Department of Medicine, Brigham and Women's Hospital
22. Functional Genomics Laboratory, Channing Division of Network Medicine, Brigham and Women's Hospital, Boston, MA
23. Center for Cancer Research, Massachusetts General Hospital, Harvard Medical School, Charlestown, MA
24. Division of Nephrology and Endocrine Unit Department of Medicine, Massachusetts General Hospital, Boston, MA
25. Cancer Center Protocol Office, Massachusetts General Hospital, Boston, MA
26. Division of Preventative Medicine, Brigham and Women's Hospital, Harvard Medical School, Boston, MA
27. Radiology and pathology, Massachusetts General Hospital, Harvard Medical School, Boston, MA
28. Brigham Research Institute, Brigham and Women's Hospital, Boston, MA
29. Immunology Program, Harvard Medical School, Boston, MA
30. Cellular Immunotherapy Program, Cancer Center, Massachusetts General Hospital, Boston, Massachusetts, USA
31. Department of Radiation Oncology, Massachusetts General Hospital, Harvard Medical School, Boston, MA
32. Folia Health, Inc., Cambridge, MA

33. Vincent Center for Reproductive Biology, Department of Obstetrics and Gynecology, Massachusetts General Hospital, Boston, MA
34. Department of Biology, Northeastern University, Boston, MA
35. College of Science, Northeastern University, Boston, MA
36. Mass General Brigham COVID Center for Innovation, Diagnostics Accelerator, Boston, MA

## Supplementary Methods:

### Analysis

Computational analyses were performed in R/markdown. LFA evaluation reports are available (<http://publicdata.omics.kitchen/Projects/MGBCCI/LFA/VendorReports/>).

Formulae for computing performance metrics and confidence intervals are provided below. IgG/IgM bands were called via visual inspection by two experienced human operators. Invalid LFAs (e.g. missing a control band) were excluded entirely from further analysis and the sample was not re-run.

A score was computed for each sample/assay/antibody combination, using the following algorithm:

- Each of N operators reading the LFA were assigned a weight of  $1/N$  to final score
- If an operator observed a band, the score would increase by  $1/N$ . If the operator saw no band, the score would decrease by  $1/N$

This process was performed separately for the IgG and IgM channels, with an overall score produced for each antibody. This per-sample/per-antibody score thus has the following values: -1 (all operators agree: no band), 0 (operators disagree), and +1 (all operators agree: band observed). Given that COVID-19 remains, even in late 2020, a low-prevalence disease, we apply a conservative case definition (score  $\geq 0$ ), where discordant operator readings (score=0) are classed as negative for presence of the antibody, in order to favor specificity. A combined IgG and IgM score was computed as the average of the two individual scores:  $(\text{IgG} + \text{IgM})/2$ .

Reproducibility analysis used the same scoring system above. Tests of the COVID+ pool that received a score  $>0$  were called “correct”. COVID- tests were ones that received a score  $<0$ . A score of 1 or -1 was called “consistent”, with all other scores indicating disagreement between operators called as “inconsistent.” These two classifications were concatenated to produce the outcomes “correct consistent”, where both operators agreed on the correct outcome, “incorrect consistent,” where both operators agreed on the incorrect outcome, and “inconsistent,” where operators disagreed on the outcome. The outcome of each individual test was plotted as a proportion of total tests of each pool on each of the two days of testing.

## **Webapp**

We developed an interactive web-application (<https://covid.omics.kitchen>) to help visualize false positive and false negative LFA readings based on test accuracy and disease prevalence. We incorporate data from the 20 LFAs reported here as well as the 6 LFAs evaluated by Whitman, et al<sup>16</sup>. County, State, and US-wide disease rates (cumulative numbers of individuals confirmed to have been infected since the start of the outbreak) are pulled dynamically from the New York Times github repository (<https://github.com/nytimes/covid-19-data>). The webapp is implemented in d3.js JavaScript and hosted on Amazon Web Services AWS/Amplify.

## **Formula:**

### Sensitivity

- $n = TP + FN$
- $sens = \frac{TP}{n}$
- $SE_{sens} = \sqrt{\frac{sens(1-sens)}{n}}$
- $CI_{95\%} = (sens - z_{\frac{\alpha}{2}} * SE_{sens} - \frac{1}{2n}, sens + z_{\frac{\alpha}{2}} * SE_{sens} + \frac{1}{2n})$

### Specificity

- $n = TN + FP$
- $spec = \frac{TN}{n}$
- $SE_{spec} = \sqrt{\frac{spec(1-spec)}{n}}$
- $CI_{95\%} = (spec - z_{\frac{\alpha}{2}} * SE_{spec} - \frac{1}{2n}, spec + z_{\frac{\alpha}{2}} * SE_{spec} + \frac{1}{2n})$

### PPV

- $n = TP + FP$
- $PPV = \frac{TP}{n}$
- $SE_{PPV} = \sqrt{\frac{PPV(1-PPV)}{n}}$
- $CI_{95\%} = (PPV - z_{\frac{\alpha}{2}} * SE_{PPV} - \frac{1}{2n}, PPV + z_{\frac{\alpha}{2}} * SE_{PPV} + \frac{1}{2n})$

### NPV

- $n = TN + FN$
- $NPV = \frac{TN}{n}$
- $SE_{NPV} = \sqrt{\frac{NPV(1-NPV)}{n}}$
- $CI_{95\%} = (NPV - z_{\frac{\alpha}{2}} * SE_{NPV} - \frac{1}{2n}, NPV + z_{\frac{\alpha}{2}} * SE_{NPV} + \frac{1}{2n})$

**Supplementary Table 1:** LFA commercial kit information, sample requirements, and protocol details

| Manufacturer  | Lot Number              | Biological Target | Sample Requirement                                          | IgG/IgM Cassette Structure     | Total input volume (uL) | Incubation time (minutes) |
|---------------|-------------------------|-------------------|-------------------------------------------------------------|--------------------------------|-------------------------|---------------------------|
| API_V1        | CoV1252004C             | N and S           | whole blood, plasma, serum                                  | Same strip                     | 10                      | 15-20                     |
| API_V2        | COV1252008B             | N and S           | whole blood, plasma, serum                                  | same strip                     | 10                      | 15-20                     |
| BioHit        | SA200401                | N and S           | venous whole blood, plasma, serum                           | Same strip                     | 10                      | 15-20                     |
| BTNX          | I2004027                | N and S           | whole blood, plasma, serum                                  | Same strip                     | 5                       | 15                        |
| Camtech       | CAM240420               | S                 | plasma, serum                                               | same strip                     | 10                      | 15                        |
| CareHealth    | G070720                 | N                 | venous whole blood, plasma, serum                           | Same strip                     | 5                       | 15-Oct                    |
| Cellex        | 20200503WI5515C025      | N and S           | venous whole blood, plasma, serum                           | Same strip                     | 10                      | 15-20                     |
| Edinburgh     | 2000798A                | N and S           | whole blood (capillary and venous)                          | Same strip                     | 20                      | 10                        |
| Genobio       | VMG200331               | N and S           | venous whole blood, plasma, serum                           | Same cassette, separate strips | 20                      | 10                        |
| InTec         | ITP6002-TC25/GJ20030288 | N and S           | whole blood (venous and fingerstick), plasma, serum         | Same cassette, separate strips | 20                      | 15-20                     |
| KHB           | 423200332               | N                 | fresh whole blood, plasma, serum                            | Same strip                     | 10                      | 15                        |
| Livzon        | CK2004240410            | N and S           | venous whole blood, plasma, serum                           | Separate cassettes             | 20                      | 15-Jan                    |
| Lumiquick     | 2004219                 | N and S           | venous whole blood, plasma, serum                           | Same strip                     | 2                       | 15                        |
| Oranoxis      | RC-0220                 | S                 | plasma, serum                                               | Same strip                     | 10                      | 15                        |
| Ozo           | P2002                   | S                 | whole blood (capillary and venous), plasma, serum           | Same cassette, separate strips | 20                      | 10                        |
| Pharmatech    | D00647                  | N                 | whole blood (venous and fingerstick), plasma, serum         | Same strip                     | 10                      | 10                        |
| RayBiotech_V1 | 501202955               | N                 | whole blood (venous and fingerstick), serum                 | Same cassette, separate strips | 25                      | 10                        |
| RayBiotech_V2 | 715202954               | N                 | whole blood (venous and fingerstick), serum                 | Same cassette, separate strips | 25                      | 10                        |
| U2U           | 172004-01               | N and S           | whole blood (venous and fingerstick), plasma, serum         | Same strip                     | 10                      | 15                        |
| VivaCheck     | SU2005001               | N and S           | whole blood (venous and fingerstick), serum, heparin plasma | Same strip                     | 10                      | 15                        |

**Supplementary Table 2:** IFU clarity rubric. Kits were assigned one point for each criteria listed if met

|    | <b>Criteria for IFU clarity</b>                                                                                                                              |
|----|--------------------------------------------------------------------------------------------------------------------------------------------------------------|
| 1  | Includes explanation of intended use                                                                                                                         |
| 2  | Storage conditions of provided kit components are listed                                                                                                     |
| 3  | Sample requirements and collection methods (e.g. whole blood, serum, plasma, equilibration temperature, etc.)                                                |
| 4  | Storage information for specimens                                                                                                                            |
| 5  | Precautions/provides warnings and conditions to avoid (e.g. do not use expired cassettes, etc.)                                                              |
| 6  | Test procedure: temperature specified for running sample and cassette                                                                                        |
| 7  | Test procedure: clearly states when cassette should be read                                                                                                  |
| 8  | Test procedure: clearly states valid time window (e.g. test results invalid after a certain interval of time)                                                |
| 9  | Test procedure: provides visual diagrams for protocol steps                                                                                                  |
| 10 | Provides instruction on how to proceed if results are invalid (e.g. repeat test, or increase incubation time)                                                |
| 11 | Includes a rubric for interpretation of results                                                                                                              |
| 12 | Provides visual diagrams or cassette images to assist with interpretation of results (has to include at least an example of a positive and negative readout) |
| 13 | Clearly describes correct volume to pipette (e.g. marked pipette, markings explained in the IFU, or dropwise measurement)                                    |
| 14 | Complete instructions provided for lancets or other accessories included for use (e.g. instructions present for all kit components)                          |



Supplementary Table 3. Usability ratings and description of kit components.

| Manufacturer  | Pipette type      | If pipette provided, material | If pipette provided: usability (e.g. volume markings?) | Buffer type (dropper, aliquot) | Rater 1 | Rater 2 | Rater 3 | IFU Clarity Final Ratings | Additional materials provided              | Notes                                                                                                   |
|---------------|-------------------|-------------------------------|--------------------------------------------------------|--------------------------------|---------|---------|---------|---------------------------|--------------------------------------------|---------------------------------------------------------------------------------------------------------|
| APL_V1        | plastic dropper   | Plastic                       | no markings                                            | dropper                        | 11      | 11      | 12      | 12                        |                                            |                                                                                                         |
| APL_V2        | None included     | NA                            | NA                                                     | dropper                        | 12      | 13      | 12      | 12                        | lancets, alcohol pads, bandaids            | Cassette is double packaged in 2 sealed pouches, no pipette is provided                                 |
| BioHit        | Plastic dropper   | Plastic                       | no markings                                            | dropper                        | 13      | 14      | 14      | 14                        |                                            |                                                                                                         |
| BTNX          | Plastic dropper   | Plastic                       | volume markings                                        | dropper                        | 12      | 13      | 13      | 12                        |                                            | Outcome call requires interpretation of color - difficult for color blind?                              |
| Camtech       | Plastic dropper   | Plastic                       | no markings                                            | dropper                        | 9       | 12      | 10      | 12                        |                                            | Provides useful information on how long it takes materials to reach room temp.                          |
| CareHealth    | Plastic dropper   | Plastic                       | no markings                                            | dropper                        | 13      | 14      | 13      | 13                        |                                            | Instructions say add 10uL of whole blood, but doesn't show what that looks like in the provided pipette |
| Cellex        | Plastic dropper   | Plastic                       | no markings                                            | dropper                        | 11      | 13      | 13      | 13                        |                                            | Provides visual ref to show that even faint bands can be positive.                                      |
|               |                   |                               |                                                        |                                |         |         |         |                           |                                            | Requires 10ul whole blood but doesn't show what that looks like in the plastic pipette                  |
| Edinburgh     | Plastic dropper   | Plastic                       | volume markings                                        | aliquot                        | 10      | 13      | 10      | 10                        | cotton swab, lancet, band-aid, alcohol pad | Requires 10ul whole blood doesn't show how much that is in plastic pipette                              |
| Genobio       | Plastic dropper   | Plastic                       | no markings                                            | dropper                        | 8       | 11      | 9       | 10                        |                                            | Not clear if requires                                                                                   |
|               |                   |                               |                                                        |                                |         |         |         |                           |                                            | 10ul sample in total,                                                                                   |
|               |                   |                               |                                                        |                                |         |         |         |                           |                                            | 2 drops in total,                                                                                       |
|               |                   |                               |                                                        |                                |         |         |         |                           |                                            | or if the cassette should be "standing"                                                                 |
| InTec         | Plastic dropper   | Plastic                       | no markings                                            | dropper                        | 14      | 14      | 14      | 14                        | lancet, alcohol pads                       |                                                                                                         |
| KHB           | Plastic dropper   | Plastic                       | no markings                                            | dropper                        | 13      | 12      | 12      | 11                        | lancet, alcohol pads                       | The procedure contains typos, including:                                                                |
|               |                   |                               |                                                        |                                |         |         |         |                           |                                            | "add 10ul of plasma <b>and perum</b> specimen"                                                          |
| Livzon        | Capillary pipette | Glass                         | volume markings                                        | dropper                        | 13      | 12      | 13      | 13                        |                                            | Large range of time in which to interpret samples (1-15 mins)                                           |
| Lumiquick     | Capillary pipette | Plastic                       | volume markings                                        | dropper                        | 14      | 14      | 14      | 14                        |                                            |                                                                                                         |
| Oranoxis      | Capillary pipette | Plastic                       | no markings                                            | dropper                        | 8       | 9       | 8       | 7                         |                                            | Conflicting guidance on time to read, no specific mentions of sample requirements/ storage              |
| Ozo           | Plastic dropper   | Plastic                       | no markings                                            | dropper                        | 11      | 12      | 12      | 12                        | cotton swab, lancet, alcohol pads          | No visual reference                                                                                     |
|               |                   |                               |                                                        |                                |         |         |         |                           |                                            | for invalid cassette                                                                                    |
| Pharmatech    | Plastic dropper   | Plastic                       | no markings                                            | dropper                        | 14      | 14      | 14      | 14                        | lancets, alcohol pads                      |                                                                                                         |
| RayBiotech_V1 |                   |                               |                                                        |                                | 13      | 13      | 13      |                           |                                            |                                                                                                         |
| RayBiotech_V2 | Plastic dropper   | Plastic                       | volume markings                                        | aliquot                        | 14      | 13      | 13      | 13                        |                                            |                                                                                                         |
| U2U           | Capillary pipette | Plastic                       | volume markings                                        | dropper                        | 14      | 14      | 14      | 14                        |                                            |                                                                                                         |
| VivaCheck     | Plastic dropper   | Plastic                       | no markings                                            | dropper                        | 11      | 12      | 11      | 10                        |                                            | No separate section for sample requirements or collection                                               |

**Supplementary Table 4.** Clinical information for the COVID-positive individuals whose plasma was used in this study. Individuals are broken out by the number of days between symptom onset and blood collection

| Interval between symptom onset and blood collection | 7-14 days   | 15-21 days  | 22-28 days  | 29+ days    | Overall     |
|-----------------------------------------------------|-------------|-------------|-------------|-------------|-------------|
|                                                     | n = 9       | n = 18      | n = 16      | n = 13      | n=56        |
| <b>Sex</b>                                          |             |             |             |             |             |
| Female                                              | 6 (66.7%)   | 10 (55.6%)  | 11 (68.8%)  | 4 (30.8%)   | 31 (55.4%)  |
| Male                                                | 3 (33.3%)   | 8 (44.4%)   | 5 (31.2%)   | 9 (69.2%)   | 25 (44.6%)  |
| <b>Age</b>                                          |             |             |             |             |             |
| Mean (Standard Deviation)                           | 72.0 (24.0) | 53.0 (15.8) | 52.9 (19.9) | 64.7 (20.2) | 58.7 (20.4) |
| Median [Min, Max]                                   | 85          | 49          | 54.5        | 67          | 57.5        |
|                                                     | [30, 98]    | [30, 84]    | [24, 88]    | [29, 94]    | [24, 98]    |
| <b>Race</b>                                         |             |             |             |             |             |
| Asian                                               | 1 (11.1%)   | 1 (5.6%)    | 1 (6.2%)    | 0 (0%)      | 3 (5.4%)    |
| Black                                               | 5 (55.6%)   | 5 (27.8%)   | 2 (12.5%)   | 4 (30.8%)   | 16 (28.6%)  |
| LatinX                                              | 1 (11.1%)   | 3 (16.7%)   | 1 (6.2%)    | 0 (0%)      | 5 (8.9%)    |
| Unknown/Other                                       | 1 (11.1%)   | 1 (5.6%)    | 2 (12.5%)   | 4 (30.8%)   | 8 (14.3%)   |
| White                                               | 1 (11.1%)   | 8 (44.4%)   | 10 (62.5%)  | 5 (38.5%)   | 24 (42.9%)  |
| <b>Primary COVID PCR test</b>                       |             |             |             |             |             |
| Cepheid Xpert Xpress SARS-CoV-2                     | 1 (11.1%)   | 0 (0%)      | 1 (6.2%)    | 0 (0%)      | 2 (3.6%)    |
| Panther Fusion SARS-CoV-2                           | 8 (88.9%)   | 17 (94.4%)  | 12 (75.0%)  | 12 (92.3%)  | 49 (87.5%)  |
| In house LDT at the Broad Institute                 | 0 (0%)      | 1 (5.6%)    | 3 (18.8 %)  | 1 (7.7%)    | 5 (8.9%)    |
| <b>Severity</b>                                     |             |             |             |             |             |
| Deceased                                            | 0 (0%)      | 0 (0%)      | 4 (25%)     | 0 (0%)      | 4 (7.1%)    |
| Hospitalized, not ICU                               | 7 (77.8%)   | 13 (72.2%)  | 2 (12.5%)   | 2 (15.4%)   | 24 (42.9%)  |
| ICU                                                 | 0 (0%)      | 0 (0%)      | 2 (12.5%)   | 2 (15.4%)   | 4 (7.1%)    |
| ICU (intubated)                                     | 0 (0%)      | 1 (5.6%)    | 1 (6.2%)    | 1 (7.7%)    | 3 (5.4%)    |
| ICU (intubated) - Recovered                         | 0 (0%)      | 3 (16.7%)   | 1 (6.2%)    | 7 (53.8%)   | 11 (19.6%)  |
| ICU (no intubation) - Recovered                     | 1 (11.1%)   | 0 (0%)      | 2 (12.5%)   | 0 (0%)      | 3 (5.4%)    |
| Outpatient                                          | 1 (11.1%)   | 1 (5.6%)    | 4 (25%)     | 1 (7.7%)    | 7 (12.5%)   |

**Supplementary Table 5.** LFA Limits of detection estimated from anti-spike antibodies concentrations measured by Simoa; amounts reflect lowest antibody concentrations in plasma samples that show a positive band

| LFA manufacturer | LoD IgG ( $\mu\text{g/mL}$ ) | LoD IgM ( $\mu\text{g/mL}$ ) |
|------------------|------------------------------|------------------------------|
| API              | 4.4                          | 5111.7                       |
| API (v2)         | 4.4                          | 6.1                          |
| BioHit           | 4.4                          | 0.6                          |
| BTNX             | 8.7                          | 7.5                          |
| Camtech          | 27.5                         | 83.8                         |
| CareHealth       | 1.5                          | 7.5                          |
| Cellex           | 1.5                          | 5111.7                       |
| Edinburgh        | 1453.8                       | 5111.7                       |
| Genobio          | 14318.7                      | 5111.7                       |
| InTec            | 27.5                         | 2940.5                       |
| KHB              | 1.5                          | 2940.5                       |
| Lumiquick        | 0.1                          | 5111.7                       |
| Oranoxis         | 14318.7                      | 10.9                         |
| OZO              | 14318.7                      | 5111.7                       |
| Phamatech        | 27.5                         | 42.4                         |
| Ray Biotech      | 14318.7                      | 638.4                        |
| Ray Biotech (v2) | 6.5                          | 29.8                         |
| U2U              | 14318.7                      | 5111.7                       |
| Vivachek         | 1.5                          | 3.4                          |
| Zhuhai Livzon    | 27.5                         | 29.8                         |
